# Supplementary material for: Starfish Apaf-1 activates effector caspase-3/9 upon apoptosis of aged eggs
Source: PubMed Central journal article supplement (PMC5785508; doi:10.1038/s41598-018-19845-6), 2018-01-25
Supplement: 41598_2018_19845_MOESM1_ESM.pdf [file 41598_2018_19845_MOESM1_ESM.pdf]

# Starfish Apaf-1 activates effector caspase-3/9 upon apoptosis of aged eggs

Ritsuko Tamura<sup>1</sup>, Mariko Takada<sup>1</sup>, Miki Sakaue<sup>1</sup>, Ayaka Yoshida<sup>1</sup>, Shirabe Ohi<sup>1</sup>, Kaoru Hirano<sup>1</sup>, Tomoyo Hayakawa<sup>1</sup>, Noritaka Hirohashi<sup>1</sup>, Kei Yura<sup>1</sup>, and Kazuyoshi Chiba<sup>1,\*</sup>

<sup>1</sup>Department of Biology, Ochanomizu University, 2-1-1 Ohtsuka, Bunkyo-ku, Tokyo, 112-8610, Japan

\*chiba.kazuyoshi@ocha.ac.jp

## Supplemental Materials and Methods

**Cytochrome *c* assay.** Samples were incubated with 10  $\mu$ M horse heart cytochrome *c* (Sigma) and 1 mM dATP (Invitrogen) final concentration for 60 min at 20°C. DEVDase activity was measured at indicated time by using Ac-DEVD-MCA.

**Immunoprecipitation.** Immunoprecipitation was performed according to the method described previously (Hiraoka *et al.*, 2004). Protein A Sepharose 4B (Sigma) was pre-adsorbed to the anti-caspase-3/9 antibody or rabbit IgG (Amersham). 20  $\mu$ L of cell-free preparation was added to 2  $\mu$ L of Sepharose beads, and incubated at 4°C for 120 min. The 2  $\mu$ L pellet of Sepharose beads was used for western blotting.

**a**

```

caspace-3/9_A.pectinifera 1 GDSNQEPMDSLPSKSYIASPTDELKAPWPGTTPADLTTOEMP-----MAPLPLADQ
caspace-3_B.taurus 1 -----NTENSVDSSKSIKT-----SEKILHGSKSMDSGCI-----
caspace-3_M.musculus 1 -----NNKTSVDSSKSIINN-----FEVHTIHGSKSVDSGCI-----
caspace-3_R.norvegicus 1 -----NNETSVDSKSIINN-----FETHTIHGSKSMDSGCI-----
caspace-3_H.sapiens 1 -----NTENSVDSSKSIKKN-----LEPKILHGSKSMDSGCI-----

caspace-3/9_A.pectinifera 54 DASDVEDVYQMKSKPRFIAVTINNKHFRT--MNRKCTDIDGRNINHVFERKGFPTLYR
caspace-3_B.taurus 30 ---SLEESYKMDYFEMGICILINNNKFNENTGMACRSCTDDVDAANLRETFMNRKVEVRIRK
caspace-3_M.musculus 30 ---YLDSSYKMDYFEMGICILINNNKFNKSTGMSSRSCTDDVDAANLRETFMGLKRYEVRNRK
caspace-3_R.norvegicus 30 ---YLDSSYKMDYFEMGICILINNNKFNKSTGMSSRSCTDDVDAANLRETFMGLKRYEVRNRK
caspace-3_H.sapiens 30 ---SLDNSYKMDYFEMGICILINNNKFNKSTGMSRSCTDDVDAANLRETFRNLRKVEVRNRK

caspace-3/9_A.pectinifera 111 TDOTGEEEMOQIILRDAASHNHOTFDCLFILAILSHGVEGATYGVDERIVKIEHITTYFEGGR
caspace-3_B.taurus 87 NDILTCKEMLELMSNVSRKEDHSKRSSFICVILLSHGEEGTFIFGTNG-PVNTLKKLASFFRGGDY
caspace-3_M.musculus 87 NDILTREDILELMSVSRKEDHSKRSSFVFCVILLSHGDEGVIFGTNG-PVLEKLLTSFFRGGDY
caspace-3_R.norvegicus 87 NDILTREDILELMSVSRKEDHSKRSSFVFCVILLSHGDEGVIFGTNG-PVLDLKKLTSFFRGGDY
caspace-3_H.sapiens 87 NDILTREDIIVLELMSVSRKEDHSKRSSFVFCVILLSHGEEGTFIFGTNG-PVDLKKLITFFRGGDY

caspace-3/9_A.pectinifera 171 CPTLACKPKLFLFOACRGERFDGGHEATDSKAVAPSDANAEOQDSIEPLSDEELAGRMLER
caspace-3_B.taurus 146 CRSLTCKPKLFLFOACRGETELDCGIE-ADSGA-----EDDM-----
caspace-3_M.musculus 146 CRSLTCKPKLFLFOACRGETELDCGIE-ADSGT-----DEEM-----
caspace-3_R.norvegicus 146 CRSLTCKPKLFLFOACRGETELDCGIE-ADSGT-----DDM-----
caspace-3_H.sapiens 146 CRSLTCKPKLFLFOACRGETELDCGIE-ADSGV-----DDDM-----

caspace-3/9_A.pectinifera 231 ELEDTDASNAIRSKLFSOSDMLLAFATVPGFVSWRNSERGSWFVQALSEVFLHANKED
caspace-3_B.taurus 181 -----AC-OKIIVVEADFLVAVSTAPGVYSWRNSRDCGSWFIQSLCAMLKLAHAKLE
caspace-3_M.musculus 181 -----AC-OKIIVVEADFLVAVSTAPGVYSWRNSRDCGSWFIQSLCAMLKLAHAKLE
caspace-3_R.norvegicus 181 -----AC-OKIIVVEADFLVAVSTAPGVYSWRNSRDCGSWFIQSLCAMLKLAHAKLE
caspace-3_H.sapiens 181 -----AC-HKIVVEADFLVAVSTAPGVYSWRNSRDCGSWFIQSLCAMLKQVADKLE

caspace-3/9_A.pectinifera 291 LLSMMTRVNNKVARAFESSS--GRNKOIPAPVTMLRKRKYFNPNGR
caspace-3_B.taurus 230 FMHILTRVNNRRIKVAIEYFSFSDSAFHAKKOIIPCTIVSMLTKKELVYVH--
caspace-3_M.musculus 230 FMHILTRVNNRRIKVAIEYFSFSDSAFHAKKOIIPCTIVSMLTKKELVYVH--
caspace-3_R.norvegicus 230 FMHILTRVNNRRIKVAIEYFSFSDSAFHAKKOIIPCTIVSMLTKKELVYVH--
caspace-3_H.sapiens 230 FMHILTRVNNRRIKVAIEYFSFSDSAFHAKKOIIPCTIVSMLTKKELVYVH--

```

**b**

```

caspace-3/9_A.pectinifera 1 GDSNQE---PMDTSLPSKSYIASPTDELKAPWPGTTPADLTTOEMP-----MAP
caspace-9_B.taurus 1 -----DPSKPSQGGKA--PVVILGEEELWPAKLRPEVLRPEVPRAVDAGSGGCTD
caspace-9_M.musculus 1 GLTAKEQRVVKLDPSQAVGNLTA--PVVILGEEELWPAKLRPEVLRPEVPRAVDAGSGCAHD
caspace-9_R.norvegicus 1 GLKSKEQKVVKLDPSQAVGNLTA--PVVILGEEELWPTRLRPEVLRPEVPRAVDAGSGCAHD
caspace-9_H.sapiens 1 -----SKPTLENLTA--PVVILRE-----IRKPEVLRPEVPRAVDAGSGGCTD

caspace-3/9_A.pectinifera 48 LPLADQDASDVEDVYQMKSKPRFIAVTINNKHFRT--MNRKCTDIDGRNINHVFERKGLG
caspace-9_B.taurus 48 VCPDRAKGNADLAVVYNADPCEGCLILINNVNFCRESGLRARTGSDIDCGRMKRRRFLLO
caspace-9_M.musculus 60 VCVPGKIRGHADMAVTLDSDFCEGCLILINNVNFCPSGGLCTRAGSNLDRDRKRRRRLWR
caspace-9_R.norvegicus 60 VCTPGKIERHADMAVTLDSDFCEGCLILINNVNFCPSGGLSTRIGSHVDCEKLRORRQWLR
caspace-9_H.sapiens 61 WGALESIRGNADLAVIILSMPCGEGCLILINNVNFCRESGLRRTRTGSDNIDCERLRRRSSLH

caspace-3/9_A.pectinifera 105 FTTLTKTDOTGEEEMOQIILRDAASHNHOTFDCLFILAILSHGVE-----GAIYGVDERIV
caspace-9_B.taurus 108 FMVEVKNDLTAKRMVLTALMOLARQDHSALDCCVVVILSHGCOASHLOFPFGAVYGTDCGCV
caspace-9_M.musculus 120 FMVEVKNDLTAKRMVLTALMEMAHRNRHALDCCVVVILSHGCOASHLOFPFGAVYGTDCGCV
caspace-9_R.norvegicus 120 FMVEVKNDLTAKRMVLTALMEMAHRNRHALDCCVVVILSHGCOASHLOFPFGAVYGTDCGCV
caspace-9_H.sapiens 101 FMVEVKNDLTAKRMVLTALLELAQDDHGRALDCCVVVILSHGCOASHLOFPFGAVYGTDCGCV

caspace-3/9_A.pectinifera 158 KIEHTTYFEGGRCPFLACKPKLFLFOACRGERFDGGHEATDSKAVAPSDANAEOQDSIEP
caspace-9_B.taurus 168 SVERIVNIFNFGSCPSLGGKPKLFFFOACGGEGKDHGFE-VESTS--PEDKTESSDS---
caspace-9_M.musculus 180 SIEKIVNIFNFGSCPSLGGKPKLFFFOACGGEGKDHGFE-VACTS--SOGRTLSDS---
caspace-9_R.norvegicus 180 SIEKIVNIFNFGSCPSLGGKPKLFFFOACGGEGKDHGFE-VACTS--SODKAFSDS---
caspace-9_H.sapiens 161 SIEKIVNIFNFGSCPSLGGKPKLFFFOACGGEGKDHGFE-VACTS--PEDSESGSNB---

caspace-3/9_A.pectinifera 218 LSDEELAORMLERELEDTDASNIAIRSKLFSOSDMLLAFATVPGFVSWRNSERGSWFVQAL
caspace-9_B.taurus 222 --EADATPF--CEGPRSIDEPDAV--SLEFPTSDILVSYSTFFPGFVSWRDRKSGSNVIEA
caspace-9_M.musculus 234 --EADAVPY--CEGPRLLDQDAV--SLEFPTSDILVSYSTFFPGFVSWRDRKSGSNVIEA
caspace-9_R.norvegicus 234 --EADAVPY--CEGPRLLDQDAV--SLEFPTSDILVSYSTFFPGFVSWRDRKSGSNVIEA
caspace-9_H.sapiens 215 --EADATPF--CEGLRTRFDQDAV--SLEFPTSDILVSYSTFFPGFVSWRDRKSGSNVIEA

caspace-3/9_A.pectinifera 278 TSEVFLHANKEDLLSMMTRVNNKVARAFESSS--GRNKOIPAPVTMLRKRKYFNPNGR
caspace-9_B.taurus 276 LDISIFEQWAHSEDLLOTLLLRVANAVSVK-----CTYKQIPGCFNFIKRLKFLFKTS-
caspace-9_M.musculus 288 LIDGILEQWAHSEDLLOSLLLRVANAVSAK-----CTYKQIPGCFNFIKRLKFLFKTS-
caspace-9_R.norvegicus 288 LIDGILEQWAHSEDLLOSLLLRVANAVSEK-----CTYKQIPGCFNFIKRLKFLFKTS-
caspace-9_H.sapiens 269 LDDIFEQWAHSEDLLOSLLLRVANAVSVK-----CTYKQIPGCFNFIKRLKFLFKTS-

```

**c**

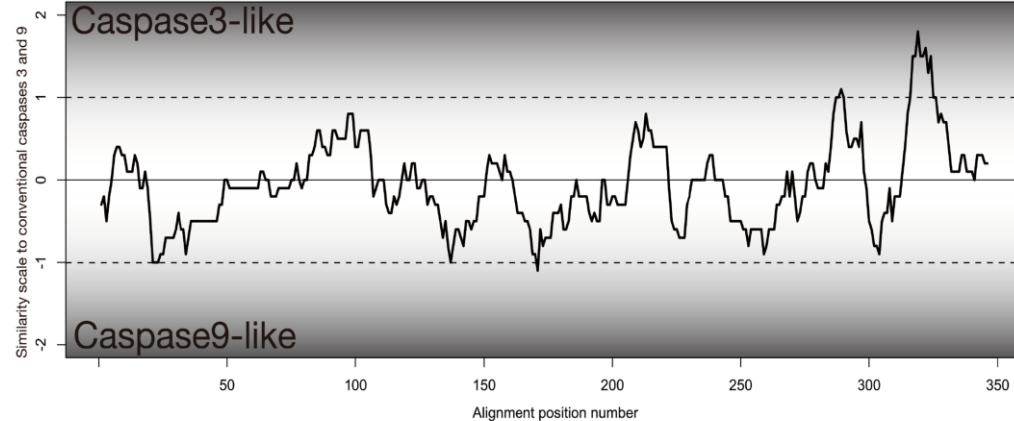

**Supplemental Figure S1.** (a, b) Multiple sequence alignment of caspase-3 (a) and caspase-9 (b) from *Homo sapiens*, *Rattus norvegicus*, *Mus musculus*, and *Bos taurus* against starfish, *Asterina pectinifera*, caspase-3/9. Positions with conserved amino acid residues are in a black background. The alignment was performed by MAFFT. (c) Conservation tendency graph of starfish caspase-3/9. The total number of black amino acid residues in a sliding window (every 15 amino acids) of caspase-3 (Supplemental Figure S1 a) was subtracted by the total number of black amino acid residues in the same sliding window of caspase-9 (Supplemental Figure S1 b). The subtracted number of each window was divided by 15, and obtained each value was plotted against the alignment position. A positive value means that the region in starfish caspase-3/9 has a caspase-3-like sequence and a negative value means that the region has a caspase-9-like sequence. The graph shows that starfish caspase-3/9 has a caspase-9-like sequence in the N-terminal side, and a caspase-3-like sequence in the C-terminal side.

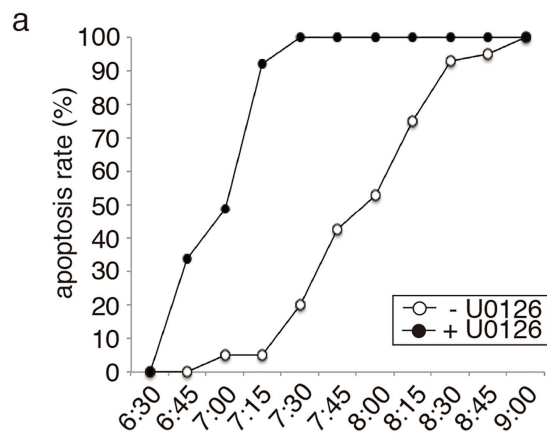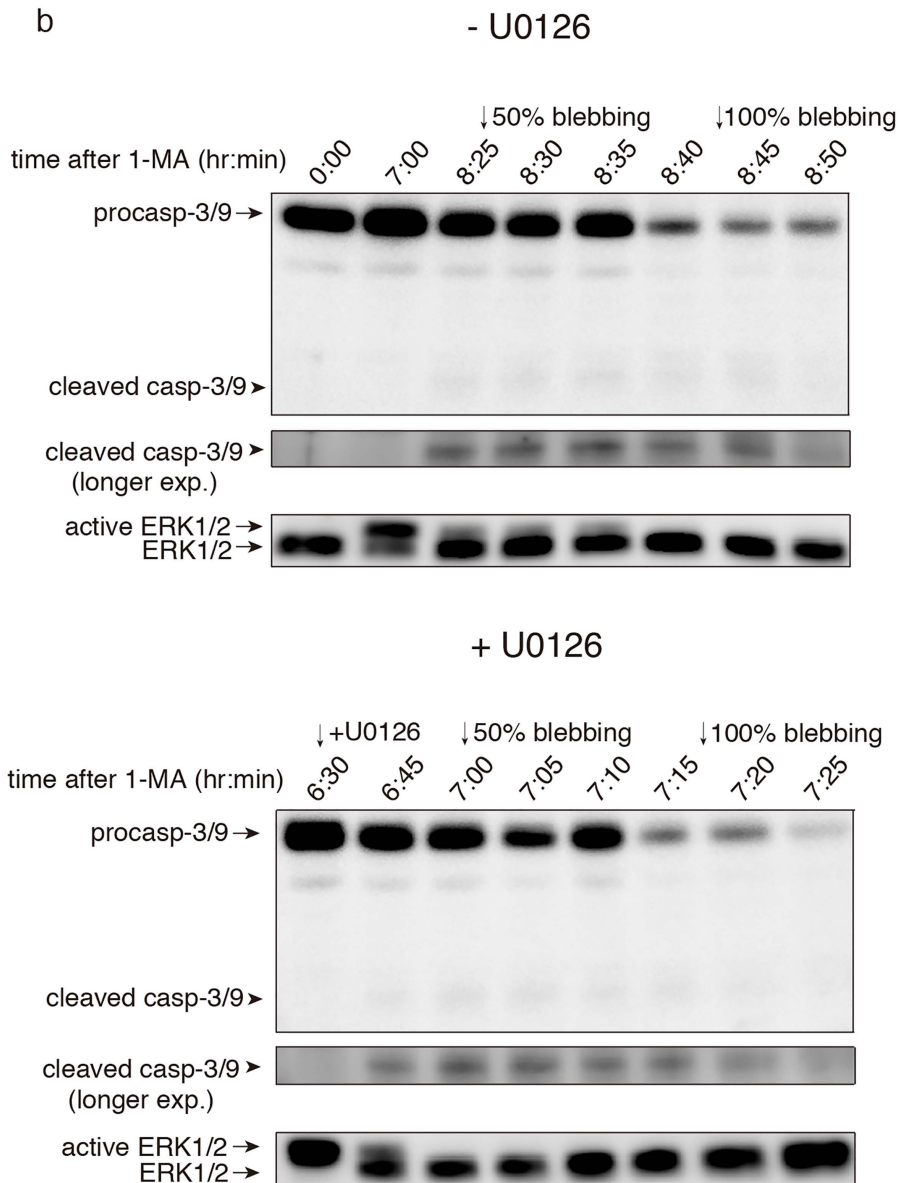

**Supplemental Figure S2.** Inhibition of ERK1/2 activates caspase-3/9. (a) The number of apoptotic eggs was counted at the indicated time after 1-MA treatment without U0126 (white circle) or with U0126 (black circle). Eggs were treated with 1  $\mu$ M of U0126 at 6.5 h after 1-MA treatment. (b) Time course of endogenous caspase-3/9 activation with or without U0126. Samples were analyzed by SDS-PAGE and western blotting with anti-caspase-3/9 and anti-ERK1/2 antibodies. Cleaved caspase-3/9 was visible after longer exposures.





|                    |     |     |       |                  |            |          |              |              |              |     |
|--------------------|-----|-----|-------|------------------|------------|----------|--------------|--------------|--------------|-----|
| H.sapiens          | 766 | TKL | -MDAT | -NENW-SHWQFLNLEP | -QDEWTKVCS | -WSD-GAR | -TVAANN-KLFL | -DHTSGLQETHG | -HST-ITQD-CF | 849 |
| G.gallus           | 767 | TKL | -MNS  | -NENW-TIENQWQDQ  | -QDEWTKVCS | -WSD-SOT | -TLVANN-KLL  | -DHTSGLQETHG | -HST-ITQD-CF | 849 |
| C.mys              | 768 | TKL | -MNS  | -NENW-TIENQWQDQ  | -QDEWTKVCS | -WSD-SOT | -TLVANN-KLL  | -DHTSGLQETHG | -HST-ITQD-CF | 849 |
| C.pitella          | 769 | TKL | -MNS  | -NENW-TIENQWQDQ  | -QDEWTKVCS | -WSD-SOT | -TLVANN-KLL  | -DHTSGLQETHG | -HST-ITQD-CF | 849 |
| G.japonica         | 770 | TKL | -MNS  | -NENW-TIENQWQDQ  | -QDEWTKVCS | -WSD-SOT | -TLVANN-KLL  | -DHTSGLQETHG | -HST-ITQD-CF | 849 |
| P.vitticeps        | 771 | TKL | -MNS  | -NENW-TIENQWQDQ  | -QDEWTKVCS | -WSD-SOT | -TLVANN-KLL  | -DHTSGLQETHG | -HST-ITQD-CF | 849 |
| A.cariolinensis    | 772 | TKL | -MNS  | -NENW-TIENQWQDQ  | -QDEWTKVCS | -WSD-SOT | -TLVANN-KLL  | -DHTSGLQETHG | -HST-ITQD-CF | 849 |
| P.bivittatus       | 773 | TKL | -MNS  | -NENW-TIENQWQDQ  | -QDEWTKVCS | -WSD-SOT | -TLVANN-KLL  | -DHTSGLQETHG | -HST-ITQD-CF | 849 |
| O.hannah           | 774 | TKL | -MNS  | -NENW-TIENQWQDQ  | -QDEWTKVCS | -WSD-SOT | -TLVANN-KLL  | -DHTSGLQETHG | -HST-ITQD-CF | 849 |
| P.macrognathus     | 775 | TKL | -MNS  | -NENW-TIENQWQDQ  | -QDEWTKVCS | -WSD-SOT | -TLVANN-KLL  | -DHTSGLQETHG | -HST-ITQD-CF | 849 |
| A.mississippiensis | 776 | TKL | -MNS  | -NENW-TIENQWQDQ  | -QDEWTKVCS | -WSD-SOT | -TLVANN-KLL  | -DHTSGLQETHG | -HST-ITQD-CF | 849 |
| C.rosalia          | 777 | TKL | -MNS  | -NENW-TIENQWQDQ  | -QDEWTKVCS | -WSD-SOT | -TLVANN-KLL  | -DHTSGLQETHG | -HST-ITQD-CF | 849 |
| G.gonostictus      | 778 | TKL | -MNS  | -NENW-TIENQWQDQ  | -QDEWTKVCS | -WSD-SOT | -TLVANN-KLL  | -DHTSGLQETHG | -HST-ITQD-CF | 849 |
| D.rosio            | 779 | TKL | -MNS  | -NENW-TIENQWQDQ  | -QDEWTKVCS | -WSD-SOT | -TLVANN-KLL  | -DHTSGLQETHG | -HST-ITQD-CF | 849 |
| S.rhinocerosus     | 780 | TKL | -MNS  | -NENW-TIENQWQDQ  | -QDEWTKVCS | -WSD-SOT | -TLVANN-KLL  | -DHTSGLQETHG | -HST-ITQD-CF | 849 |
| S.graban           | 781 | TKL | -MNS  | -NENW-TIENQWQDQ  | -QDEWTKVCS | -WSD-SOT | -TLVANN-KLL  | -DHTSGLQETHG | -HST-ITQD-CF | 849 |
| P.nattereri        | 782 | TKL | -MNS  | -NENW-TIENQWQDQ  | -QDEWTKVCS | -WSD-SOT | -TLVANN-KLL  | -DHTSGLQETHG | -HST-ITQD-CF | 849 |
| A.mexicana         | 783 | TKL | -MNS  | -NENW-TIENQWQDQ  | -QDEWTKVCS | -WSD-SOT | -TLVANN-KLL  | -DHTSGLQETHG | -HST-ITQD-CF | 849 |
| I.punctatus        | 784 | TKL | -MNS  | -NENW-TIENQWQDQ  | -QDEWTKVCS | -WSD-SOT | -TLVANN-KLL  | -DHTSGLQETHG | -HST-ITQD-CF | 849 |
| E.lucius           | 785 | TKL | -MNS  | -NENW-TIENQWQDQ  | -QDEWTKVCS | -WSD-SOT | -TLVANN-KLL  | -DHTSGLQETHG | -HST-ITQD-CF | 849 |
| S.salar            | 786 | TKL | -MNS  | -NENW-TIENQWQDQ  | -QDEWTKVCS | -WSD-SOT | -TLVANN-KLL  | -DHTSGLQETHG | -HST-ITQD-CF | 849 |
| P.latiipinna       | 787 | TKL | -MNS  | -NENW-TIENQWQDQ  | -QDEWTKVCS | -WSD-SOT | -TLVANN-KLL  | -DHTSGLQETHG | -HST-ITQD-CF | 849 |
| A.maculatus        | 788 | TKL | -MNS  | -NENW-TIENQWQDQ  | -QDEWTKVCS | -WSD-SOT | -TLVANN-KLL  | -DHTSGLQETHG | -HST-ITQD-CF | 849 |
| C.variatus         | 789 | TKL | -MNS  | -NENW-TIENQWQDQ  | -QDEWTKVCS | -WSD-SOT | -TLVANN-KLL  | -DHTSGLQETHG | -HST-ITQD-CF | 849 |
| P.nyereii          | 790 | TKL | -MNS  | -NENW-TIENQWQDQ  | -QDEWTKVCS | -WSD-SOT | -TLVANN-KLL  | -DHTSGLQETHG | -HST-ITQD-CF | 849 |
| O.notic            | 791 | TKL | -MNS  | -NENW-TIENQWQDQ  | -QDEWTKVCS | -WSD-SOT | -TLVANN-KLL  | -DHTSGLQETHG | -HST-ITQD-CF | 849 |
| L.bergi            | 792 | TKL | -MNS  | -NENW-TIENQWQDQ  | -QDEWTKVCS | -WSD-SOT | -TLVANN-KLL  | -DHTSGLQETHG | -HST-ITQD-CF | 849 |
| A.limeus           | 793 | TKL | -MNS  | -NENW-TIENQWQDQ  | -QDEWTKVCS | -WSD-SOT | -TLVANN-KLL  | -DHTSGLQETHG | -HST-ITQD-CF | 849 |
| S.partitus         | 794 | TKL | -MNS  | -NENW-TIENQWQDQ  | -QDEWTKVCS | -WSD-SOT | -TLVANN-KLL  | -DHTSGLQETHG | -HST-ITQD-CF | 849 |
| T.rubripes         | 795 | TKL | -MNS  | -NENW-TIENQWQDQ  | -QDEWTKVCS | -WSD-SOT | -TLVANN-KLL  | -DHTSGLQETHG | -HST-ITQD-CF | 849 |
| N.kuhate           | 796 | TKL | -MNS  | -NENW-TIENQWQDQ  | -QDEWTKVCS | -WSD-SOT | -TLVANN-KLL  | -DHTSGLQETHG | -HST-ITQD-CF | 849 |
| A.atriatum         | 797 | TKL | -MNS  | -NENW-TIENQWQDQ  | -QDEWTKVCS | -WSD-SOT | -TLVANN-KLL  | -DHTSGLQETHG | -HST-ITQD-CF | 849 |
| K.nemoratus        | 798 | TKL | -MNS  | -NENW-TIENQWQDQ  | -QDEWTKVCS | -WSD-SOT | -TLVANN-KLL  | -DHTSGLQETHG | -HST-ITQD-CF | 849 |
| A.orientalis       | 799 | TKL | -MNS  | -NENW-TIENQWQDQ  | -QDEWTKVCS | -WSD-SOT | -TLVANN-KLL  | -DHTSGLQETHG | -HST-ITQD-CF | 849 |
| X.laevis           | 800 | TKL | -MNS  | -NENW-TIENQWQDQ  | -QDEWTKVCS | -WSD-SOT | -TLVANN-KLL  | -DHTSGLQETHG | -HST-ITQD-CF | 849 |
| A.milegor          | 801 | TKL | -MNS  | -NENW-TIENQWQDQ  | -QDEWTKVCS | -WSD-SOT | -TLVANN-KLL  | -DHTSGLQETHG | -HST-ITQD-CF | 849 |
| G.favosita         | 802 | TKL | -MNS  | -NENW-TIENQWQDQ  | -QDEWTKVCS | -WSD-SOT | -TLVANN-KLL  | -DHTSGLQETHG | -HST-ITQD-CF | 849 |
| N.vectensis        | 803 | TKL | -MNS  | -NENW-TIENQWQDQ  | -QDEWTKVCS | -WSD-SOT | -TLVANN-KLL  | -DHTSGLQETHG | -HST-ITQD-CF | 849 |
| S.kowalevskii      | 804 | TKL | -MNS  | -NENW-TIENQWQDQ  | -QDEWTKVCS | -WSD-SOT | -TLVANN-KLL  | -DHTSGLQETHG | -HST-ITQD-CF | 849 |
| A.pectinifera      | 805 | TKL | -MNS  | -NENW-TIENQWQDQ  | -QDEWTKVCS | -WSD-SOT | -TLVANN-KLL  | -DHTSGLQETHG | -HST-ITQD-CF | 849 |
| S.purpuratus       | 806 | TKL | -MNS  | -NENW-TIENQWQDQ  | -QDEWTKVCS | -WSD-SOT | -TLVANN-KLL  | -DHTSGLQETHG | -HST-ITQD-CF | 849 |
| E.mexicana         | 807 | TKL | -MNS  | -NENW-TIENQWQDQ  | -QDEWTKVCS | -WSD-SOT | -TLVANN-KLL  | -DHTSGLQETHG | -HST-ITQD-CF | 849 |
| A.orientalis       | 808 | TKL | -MNS  | -NENW-TIENQWQDQ  | -QDEWTKVCS | -WSD-SOT | -TLVANN-KLL  | -DHTSGLQETHG | -HST-ITQD-CF | 849 |
| M.quadrifasciata   | 809 | TKL | -MNS  | -NENW-TIENQWQDQ  | -QDEWTKVCS | -WSD-SOT | -TLVANN-KLL  | -DHTSGLQETHG | -HST-ITQD-CF | 849 |
| H.laboriosa        | 810 | TKL | -MNS  | -NENW-TIENQWQDQ  | -QDEWTKVCS | -WSD-SOT | -TLVANN-KLL  | -DHTSGLQETHG | -HST-ITQD-CF | 849 |
| D.noveboracensis   | 811 | TKL | -MNS  | -NENW-TIENQWQDQ  | -QDEWTKVCS | -WSD-SOT | -TLVANN-KLL  | -DHTSGLQETHG | -HST-ITQD-CF | 849 |
| A.colombiana       | 812 | TKL | -MNS  | -NENW-TIENQWQDQ  | -QDEWTKVCS | -WSD-SOT | -TLVANN-KLL  | -DHTSGLQETHG | -HST-ITQD-CF | 849 |
| S.sivicta          | 813 | TKL | -MNS  | -NENW-TIENQWQDQ  | -QDEWTKVCS | -WSD-SOT | -TLVANN-KLL  | -DHTSGLQETHG | -HST-ITQD-CF | 849 |
| F.ariensis         | 814 | TKL | -MNS  | -NENW-TIENQWQDQ  | -QDEWTKVCS | -WSD-SOT | -TLVANN-KLL  | -DHTSGLQETHG | -HST-ITQD-CF | 849 |
| A.pisum            | 815 | TKL | -MNS  | -NENW-TIENQWQDQ  | -QDEWTKVCS | -WSD-SOT | -TLVANN-KLL  | -DHTSGLQETHG | -HST-ITQD-CF | 849 |
| B.mori             | 816 | TKL | -MNS  | -NENW-TIENQWQDQ  | -QDEWTKVCS | -WSD-SOT | -TLVANN-KLL  | -DHTSGLQETHG | -HST-ITQD-CF | 849 |
| P.yostellia        | 817 | TKL | -MNS  | -NENW-TIENQWQDQ  | -QDEWTKVCS | -WSD-SOT | -TLVANN-KLL  | -DHTSGLQETHG | -HST-ITQD-CF | 849 |
| L.ocalata          | 818 | TKL | -MNS  | -NENW-TIENQWQDQ  | -QDEWTKVCS | -WSD-SOT | -TLVANN-KLL  | -DHTSGLQETHG | -HST-ITQD-CF | 849 |
| P.athous           | 819 | TKL | -MNS  | -NENW-TIENQWQDQ  | -QDEWTKVCS | -WSD-SOT | -TLVANN-KLL  | -DHTSGLQETHG | -HST-ITQD-CF | 849 |
| C.olegans          | 820 | TKL | -MNS  | -NENW-TIENQWQDQ  | -QDEWTKVCS | -WSD-SOT | -TLVANN-KLL  | -DHTSGLQETHG | -HST-ITQD-CF | 849 |
| C.siniensis        | 821 | TKL | -MNS  | -NENW-TIENQWQDQ  | -QDEWTKVCS | -WSD-SOT | -TLVANN-KLL  | -DHTSGLQETHG | -HST-ITQD-CF | 849 |
| E.mollis           | 822 | TKL | -MNS  | -NENW-TIENQWQDQ  | -QDEWTKVCS | -WSD-SOT | -TLVANN-KLL  | -DHTSGLQETHG | -HST-ITQD-CF | 849 |
| B.latifrons        | 823 | TKL | -MNS  | -NENW-TIENQWQDQ  | -QDEWTKVCS | -WSD-SOT | -TLVANN-KLL  | -DHTSGLQETHG | -HST-ITQD-CF | 849 |
| B.cucurbitae       | 824 | TKL | -MNS  | -NENW-TIENQWQDQ  | -QDEWTKVCS | -WSD-SOT | -TLVANN-KLL  | -DHTSGLQETHG | -HST-ITQD-CF | 849 |
| C.capitata         | 825 | TKL | -MNS  | -NENW-TIENQWQDQ  | -QDEWTKVCS | -WSD-SOT | -TLVANN-KLL  | -DHTSGLQETHG | -HST-ITQD-CF | 849 |

|                    |     |            |        |        |      |          |               |        |            |        |      |      |
|--------------------|-----|------------|--------|--------|------|----------|---------------|--------|------------|--------|------|------|
| H.sapiens          | 837 | -VAVDNRRLQ | -DHWRT | -DIDTL | -EAO | -VSSCCSP | -RQVTAFOGNG   | -TEELE | -NMFVDFGPH | -KXWTH | -QFT | 1012 |
| G.gallus           | 838 | -VAVDNRRLQ | -DHWRT | -DIDTL | -EAO | -VSSCCSP | -RQVTAFOGNG   | -TEELE | -NMFVDFGPH | -KXWTH | -QFT | 1012 |
| C.mys              | 839 | -VAVDNRRLQ | -DHWRT | -DIDTL | -EAO | -VSSCCSP | -RQVTAFOGNG   | -TEELE | -NMFVDFGPH | -KXWTH | -QFT | 1012 |
| C.pitella          | 840 | -VAVDNRRLQ | -DHWRT | -DIDTL | -EAO | -VSSCCSP | -RQVTAFOGNG   | -TEELE | -NMFVDFGPH | -KXWTH | -QFT | 1012 |
| G.japonica         | 841 | -VAVDNRRLQ | -DHWRT | -DIDTL | -EAO | -VSSCCSP | -RQVTAFOGNG   | -TEELE | -NMFVDFGPH | -KXWTH | -QFT | 1012 |
| P.vitticeps        | 842 | -VAVDNRRLQ | -DHWRT | -DIDTL | -EAO | -VSSCCSP | -RQVTAFOGNG   | -TEELE | -NMFVDFGPH | -KXWTH | -QFT | 1012 |
| A.cariolinensis    | 843 | -VAVDNRRLQ | -DHWRT | -DIDTL | -EAO | -VSSCCSP | -RQVTAFOGNG   | -TEELE | -NMFVDFGPH | -KXWTH | -QFT | 1012 |
| P.bivittatus       | 844 | -VAVDNRRLQ | -DHWRT | -DIDTL | -EAO | -VSSCCSP | -RQVTAFOGNG   | -TEELE | -NMFVDFGPH | -KXWTH | -QFT | 1012 |
| O.hannah           | 845 | -VAVDNRRLQ | -DHWRT | -DIDTL | -EAO | -VSSCCSP | -RQVTAFOGNG   | -TEELE | -NMFVDFGPH | -KXWTH | -QFT | 1012 |
| P.macrognathus     | 846 | -VAVDNRRLQ | -DHWRT | -DIDTL | -EAO | -VSSCCSP | -RQVTAFOGNG   | -TEELE | -NMFVDFGPH | -KXWTH | -QFT | 1012 |
| A.mississippiensis | 847 | -VAVDNRRLQ | -DHWRT | -DIDTL | -EAO | -VSSCCSP | -RQVTAFOGNG   | -TEELE | -NMFVDFGPH | -KXWTH | -QFT | 1012 |
| C.rosalia          | 848 | -VAVDNRRLQ | -DHWRT | -DIDTL | -EAO | -VSSCCSP | -RQVTAFOGNG   | -TEELE | -NMFVDFGPH | -KXWTH | -QFT | 1012 |
| G.gonostictus      | 849 | -VAVDNRRLQ | -DHWRT | -DIDTL | -EAO | -VSSCCSP | -RQVTAFOGNG   | -TEELE | -NMFVDFGPH | -KXWTH | -QFT | 1012 |
| D.rosio            | 850 | -VAVDNRRLQ | -DHWRT | -DIDTL | -EAO | -VSSCCSP | -RQVTAFOGNG   | -TEELE | -NMFVDFGPH | -KXWTH | -QFT | 1012 |
| S.rhinocerosus     | 851 | -VAVDNRRLQ | -DHWRT | -DIDTL | -EAO | -VSSCCSP | -RQVTAFOGNG   | -TEELE | -NMFVDFGPH | -KXWTH | -QFT | 1012 |
| S.graban           | 852 | -VAVDNRRLQ | -DHWRT | -DIDTL | -EAO | -VSSCCSP | -RQVTAFOGNG   | -TEELE | -NMFVDFGPH | -KXWTH | -QFT | 1012 |
| P.nattereri        | 853 | -VAVDNRRLQ | -DHWRT | -DIDTL | -EAO | -VSSCCSP | -RQVTAFOGNG   | -TEELE | -NMFVDFGPH | -KXWTH | -QFT | 1012 |
| A.mexicana         | 854 | -VAVDNRRLQ | -DHWRT | -DIDTL | -EAO | -VSSCCSP | -RQVTAFOGNG   | -TEELE | -NMFVDFGPH | -KXWTH | -QFT | 1012 |
| I.punctatus        | 855 | -VAVDNRRLQ | -DHWRT | -DIDTL | -EAO | -VSSCCSP | -RQVTAFOGNG   | -TEELE | -NMFVDFGPH | -KXWTH | -QFT | 1012 |
| E.lucius           | 856 | -VAVDNRRLQ | -DHWRT | -DIDTL | -EAO | -VSSCCSP | -RQVTAFOGNG   | -TEELE | -NMFVDFGPH | -KXWTH | -QFT | 1012 |
| S.salar            | 857 | -VAVDNRRLQ | -DHWRT | -DIDTL | -EAO | -VSSCCSP | -RQVTAFOGNG   | -TEELE | -NMFVDFGPH | -KXWTH | -QFT | 1012 |
| P.latiipinna       | 858 | -VAVDNRRLQ | -DHWRT | -DIDTL | -EAO | -VSSCCSP | -RQVTAFOGNG   | -TEELE | -NMFVDFGPH | -KXWTH | -QFT | 1012 |
| A.maculatus        | 859 | -VAVDNRRLQ | -DHWRT | -DIDTL | -EAO | -VSSCCSP | -RQVTAFOGNG   | -TEELE | -NMFVDFGPH | -KXWTH | -QFT | 1012 |
| C.variatus         | 860 | -VAVDNRRLQ | -DHWRT | -DIDTL | -EAO | -VSSCCSP | -RQVTAFOGNG   | -TEELE | -NMFVDFGPH | -KXWTH | -QFT | 1012 |
| P.nyereii          | 861 | -VAVDNRRLQ | -DHWRT | -DIDTL | -EAO | -VSSCCSP | -RQVTAFOGNG   | -TEELE | -NMFVDFGPH | -KXWTH | -QFT | 1012 |
| O.notic            | 862 | -VAVDNRRLQ | -DHWRT | -DIDTL | -EAO | -VSSCCSP | -RQVTAFOGNG   | -TEELE | -NMFVDFGPH | -KXWTH | -QFT | 1012 |
| L.bergi            | 863 | -VAVDNRRLQ | -DHWRT | -DIDTL | -EAO | -VSSCCSP | -RQVTAFOGNG   | -TEELE | -NMFVDFGPH | -KXWTH | -QFT | 1012 |
| A.limeus           | 864 | -VAVDNRRLQ | -DHWRT | -DIDTL | -EAO | -VSSCCSP | -RQVTAFOGNG   | -TEELE | -NMFVDFGPH | -KXWTH | -QFT | 1012 |
| S.partitus         | 865 | -VAVDNRRLQ | -DHWRT | -DIDTL | -EAO | -VSSCCSP | -RQVTAFOGNG   | -TEELE | -NMFVDFGPH | -KXWTH | -QFT | 1012 |
| T.rubripes         | 866 | -VAVDNRRLQ | -DHWRT | -DIDTL | -EAO | -VSSCCSP | -RQVTAFOGNG   | -TEELE | -NMFVDFGPH | -KXWTH | -QFT | 1012 |
| N.kuhate           | 867 | -VAVDNRRLQ | -DHWRT | -DIDTL | -EAO | -VSSCCSP | -RQVTAFOGNG   | -TEELE | -NMFVDFGPH | -KXWTH | -QFT | 1012 |
| A.atriatum         | 868 | -VAVDNRRLQ | -DHWRT | -DIDTL | -EAO | -VSSCCSP | -RQVTAFOGNG   | -TEELE | -NMFVDFGPH | -KXWTH | -QFT | 1012 |
| K.nemoratus        | 869 | -VAVDNRRLQ | -DHWRT | -DIDTL | -EAO | -VSSCCSP | -RQVTAFOGNG   | -TEELE | -NMFVDFGPH | -KXWTH | -QFT | 1012 |
| A.orientalis       | 870 | -VAVDNRRLQ | -DHWRT | -DIDTL | -EAO | -VSSCCSP | -RQVTAFOGNG   | -TEELE | -NMFVDFGPH | -KXWTH | -QFT | 1012 |
| X.laevis           | 871 | -VAVDNRRLQ | -DHWRT | -DIDTL | -EAO | -VSSCCSP | -RQVTAFOGNG   | -TEELE | -NMFVDFGPH | -KXWTH | -QFT | 1012 |
| A.milegor          | 872 | -VAVDNRRLQ | -DHWRT | -DIDTL | -EAO | -VSSCCSP | -RQVTAFOGNG   | -TEELE | -NMFVDFGPH | -KXWTH | -QFT | 1012 |
| G.favosita         | 873 | -VAVDNRRLQ | -DHWRT | -DIDTL | -EAO | -VSSCCSP | -RQVTAFOGNG   | -TEELE | -NMFVDFGPH | -KXWTH | -QFT | 1012 |
| N.vectensis        | 874 | -VAVDNRRLQ | -DHWRT | -DIDTL | -EAO | -VSSCCSP | -RQVTAFOGNG   | -TEELE | -NMFVDFGPH | -KXWTH | -QFT | 1012 |
| S.kowalevskii      | 875 | -VAVDNRRLQ | -DHWRT | -DIDTL | -EAO | -VSSCCSP | -RQVTAFOGNG   | -TEELE | -NMFVDFGPH | -KXWTH | -QFT | 1012 |
| A.pectinifera      | 876 | -VAVDNRRLQ | -DHWRT | -DIDTL | -EAO | -VSSCCSP | -RQVTAFOGNG   | -TEELE | -NMFVDFGPH | -KXWTH | -QFT | 1012 |
| S.purpuratus       | 877 | -VAVDNRRLQ | -DHWRT | -DIDTL | -EAO | -VSSCCSP | -RQVTAFOGNG   | -TEELE | -NMFVDFGPH | -KXWTH | -QFT | 1012 |
| E.mexicana         | 878 | -VAVDNRRLQ | -DHWRT | -DIDTL | -EAO | -VSSCCSP | -RQVTAFOGNG   | -TEELE | -NMFVDFGPH | -KXWTH | -QFT | 1012 |
| A.orientalis       | 879 | -VAVDNRRLQ | -DHWRT | -DIDTL | -EAO | -VSSCCSP | -RQVTAFOGNG   | -TEELE | -NMFVDFGPH | -KXWTH | -QFT | 1012 |
| M.quadrifasciata   | 880 | -VAVDNRRLQ | -DHWRT | -DIDTL | -EAO | -VSSCCSP | -RQVTAFOGNG   | -TEELE | -NMFVDFGPH | -KXWTH | -QFT | 1012 |
| H.laboriosa        | 881 | -VAVDNRRLQ | -DHWRT | -DIDTL | -EAO | -VSSCCSP | -RQVTAFOGNG   | -TEELE | -NMFVDFGPH | -KXWTH | -QFT | 1012 |
| D.noveboracensis   | 882 | -VAVDNRRLQ | -DHWRT | -DIDTL | -EAO | -VSSCCSP | -RQVTAFOGNG</ |        |            |        |      |      |

|                    |      |                     |              |                     |           |                  |              |       |                   |      |                    |      |         |      |
|--------------------|------|---------------------|--------------|---------------------|-----------|------------------|--------------|-------|-------------------|------|--------------------|------|---------|------|
| H.sapiens          | 1007 | ATKFSSTADKT-AK      | ---TSPFLDPLL | ---MELRHGHCVRCTFSFD | ---STLALT | ---GDGKEIRLMDVSR | ---GELLMLCAP | ---LS | EEGATHTGGWTLDFSPD | 1188 | H.sapiens          | 1246 | TLE     | 1248 |
| G.gallus           | 1008 | GSFSPSTADKT-AK      | ---TSPFESSVL | ---MELKHGHCVRCTFSFD | ---MILLAT | ---GDGKOTDIRMLT  | ---GELLFCSF  | ---VT | VEEPTHTGGWTLDFSPD | 1189 | G.gallus           | 1248 | KL      | 1249 |
| C.mydas            | 1026 | ATKFSSTADKT-AK(104) | TSPFESSVL    | ---MELRHGHCVRCTFSFD | ---DKFLAT | ---GDGKEIRLMDVSR | ---GELLMLCAP | ---VT | VEEPTHTGGWTLDFSPD | 1192 | C.mydas            | 1264 | LUN(1)  | 1267 |
| C.picta bellii     | 1104 | ATKFSSTADKT-AK      | ---TSPFESSVL | ---MELKHGHCVRCTFSFD | ---MILLAT | ---GDGKEIRLMDVSR | ---GELLMLCAP | ---VT | VEEPTHTGGWTLDFSPD | 1202 | C.picta bellii     | 1250 | NLE     | 1252 |
| G.japonicas        | 1104 | ATKFSSTADKT-AK      | ---TSPFESSVL | ---MELKHGHCVRCTFSFD | ---MILLAT | ---GDGKEIRLMDVSR | ---GELLMLCAP | ---VT | VEEPTHTGGWTLDFSPD | 1194 | G.japonicas        | 1254 | TMD(3)  | 1259 |
| P.vitticeps        | 1101 | GRFSTADKT-AK        | ---TSPFESSVL | ---MELKHGHCVRCTFSFD | ---MILLAT | ---GDGKEIRLMDVSR | ---GELLMLCAP | ---VT | VEEPTHTGGWTLDFSPD | 1186 | P.vitticeps        | 1244 | IME(3)  | 1249 |
| A.carolinensis     | 1101 | ATKFSSTADKT-AK      | ---TSPFESSVL | ---MELKHGHCVRCTFSFD | ---MILLAT | ---GDGKEIRLMDVSR | ---GELLMLCAP | ---VT | VEEPTHTGGWTLDFSPD | 1193 | A.carolinensis     | 1246 | IME     | 1248 |
| P.hisvittatus      | 1007 | ATKFSSTADKT-AK      | ---TSPFESSVL | ---MELKHGHCVRCTFSFD | ---MILLAT | ---GDGKEIRLMDVSR | ---GELLMLCAP | ---VT | VEEPTHTGGWTLDFSPD | 1188 | P.hisvittatus      | 1246 | IME     | 1248 |
| O.hannah           | 1099 | ATKFSSTADKT-AK      | ---TSPFESSVL | ---MELKHGHCVRCTFSFD | ---MILLAT | ---GDGKEIRLMDVSR | ---GELLMLCAP | ---VT | VEEPTHTGGWTLDFSPD | 1188 | O.hannah           | 1156 | IME     | 1158 |
| P.mucrosquamatus   | 1091 | ATKFSSTADKT-AK      | ---TSPFESSVL | ---MELKHGHCVRCTFSFD | ---MILLAT | ---GDGKEIRLMDVSR | ---GELLMLCAP | ---VT | VEEPTHTGGWTLDFSPD | 1188 | P.mucrosquamatus   | 1246 | IME     | 1248 |
| A.mississippiensis | 1095 | ATKFSSTADKT-AK      | ---TSPFESSVL | ---MELKHGHCVRCTFSFD | ---MILLAT | ---GDGKEIRLMDVSR | ---GELLMLCAP | ---VT | VEEPTHTGGWTLDFSPD | 1187 | A.mississippiensis | 1225 | ---     | 1225 |
| C.porosus          | 1095 | ATKFSSTADKT-AK      | ---TSPFESSVL | ---MELKHGHCVRCTFSFD | ---MILLAT | ---GDGKEIRLMDVSR | ---GELLMLCAP | ---VT | VEEPTHTGGWTLDFSPD | 1188 | C.porosus          | 1246 | IME     | 1247 |
| G.gangeticus       | 1096 | ATKFSSTADKT-AK      | ---TSPFESSVL | ---MELKHGHCVRCTFSFD | ---MILLAT | ---GDGKEIRLMDVSR | ---GELLMLCAP | ---VT | VEEPTHTGGWTLDFSPD | 1187 | G.gangeticus       | 1246 | IME     | 1248 |
| B.terrieri         | 1105 | GRFSTADKT-AK        | ---TSPFESSVL | ---MELKHGHCVRCTFSFD | ---MILLAT | ---GDGKEIRLMDVSR | ---GELLMLCAP | ---VT | VEEPTHTGGWTLDFSPD | 1197 | B.terrieri         | 1256 | RLE(4)  | 1261 |
| S.rhinocerosus     | 1105 | GRFSTADKT-AK        | ---TSPFESSVL | ---MELKHGHCVRCTFSFD | ---MILLAT | ---GDGKEIRLMDVSR | ---GELLMLCAP | ---VT | VEEPTHTGGWTLDFSPD | 1197 | S.rhinocerosus     | 1256 | ---     | 1258 |
| S.graham           | 1105 | GRFSTADKT-AK        | ---TSPFESSVL | ---MELKHGHCVRCTFSFD | ---MILLAT | ---GDGKEIRLMDVSR | ---GELLMLCAP | ---VT | VEEPTHTGGWTLDFSPD | 1197 | S.graham           | 1255 | KVE(4)  | 1261 |
| P.nattereri        | 1106 | GVFSTADKT-AK        | ---TSPFESSVL | ---MELKHGHCVRCTFSFD | ---MILLAT | ---GDGKEIRLMDVSR | ---GELLMLCAP | ---VT | VEEPTHTGGWTLDFSPD | 1198 | P.nattereri        | 1256 | OVE(4)  | 1262 |
| A.americanus       | 1118 | GSFSTADKT-AK        | ---TSPFESSVL | ---MELKHGHCVRCTFSFD | ---MILLAT | ---GDGKEIRLMDVSR | ---GELLMLCAP | ---VT | VEEPTHTGGWTLDFSPD | 1202 | A.americanus       | 1259 | OVE(4)  | 1264 |
| I.punctatus        | 1106 | GMFSTADKT-AK        | ---TSPFESSVL | ---MELKHGHCVRCTFSFD | ---MILLAT | ---GDGKEIRLMDVSR | ---GELLMLCAP | ---VT | VEEPTHTGGWTLDFSPD | 1198 | I.punctatus        | 1256 | OVE(4)  | 1262 |
| E.lucius           | 1122 | GLFSTADKT-AK        | ---TSPFESSVL | ---MELKHGHCVRCTFSFD | ---MILLAT | ---GDGKEIRLMDVSR | ---GELLMLCAP | ---VT | VEEPTHTGGWTLDFSPD | 1214 | E.lucius           | 1272 | KVE     | 1274 |
| S.salar            | 1113 | GLFSTADKT-AK        | ---TSPFESSVL | ---MELKHGHCVRCTFSFD | ---MILLAT | ---GDGKEIRLMDVSR | ---GELLMLCAP | ---VT | VEEPTHTGGWTLDFSPD | 1197 | S.salar            | 1263 | KVE     | 1265 |
| P.latiplana        | 1107 | GLFSTADKT-AK        | ---TSPFESSVL | ---MELKHGHCVRCTFSFD | ---MILLAT | ---GDGKEIRLMDVSR | ---GELLMLCAP | ---VT | VEEPTHTGGWTLDFSPD | 1200 | P.latiplana        | 1258 | RVA     | 1260 |
| X.naculatus        | 1107 | GLFSTADKT-AK        | ---TSPFESSVL | ---MELKHGHCVRCTFSFD | ---MILLAT | ---GDGKEIRLMDVSR | ---GELLMLCAP | ---VT | VEEPTHTGGWTLDFSPD | 1200 | X.naculatus        | 1256 | RVA     | 1258 |
| C.variegatus       | 1105 | GLFSTADKT-AK        | ---TSPFESSVL | ---MELKHGHCVRCTFSFD | ---MILLAT | ---GDGKEIRLMDVSR | ---GELLMLCAP | ---VT | VEEPTHTGGWTLDFSPD | 1197 | C.variegatus       | 1255 | RVA     | 1257 |
| P.yererei          | 1106 | GFSTADKT-AK         | ---TSPFESSVL | ---MELKHGHCVRCTFSFD | ---MILLAT | ---GDGKEIRLMDVSR | ---GELLMLCAP | ---VT | VEEPTHTGGWTLDFSPD | 1198 | P.yererei          | 1256 | RVA     | 1258 |
| O.niotic           | 1106 | GFSTADKT-AK         | ---TSPFESSVL | ---MELKHGHCVRCTFSFD | ---MILLAT | ---GDGKEIRLMDVSR | ---GELLMLCAP | ---VT | VEEPTHTGGWTLDFSPD | 1198 | O.niotic           | 1256 | RVA     | 1258 |
| L.beryllia         | 1111 | GLFSTADKT-AK        | ---TSPFESSVL | ---MELKHGHCVRCTFSFD | ---MILLAT | ---GDGKEIRLMDVSR | ---GELLMLCAP | ---VT | VEEPTHTGGWTLDFSPD | 1203 | L.beryllia         | 1263 | RVA     | 1263 |
| A.limous           | 1145 | GFSTADKT-AK         | ---TSPFESSVL | ---MELKHGHCVRCTFSFD | ---MILLAT | ---GDGKEIRLMDVSR | ---GELLMLCAP | ---VT | VEEPTHTGGWTLDFSPD | 1227 | A.limous           | 1292 | RVA(1)  | 1294 |
| S.partitus         | 1106 | GLFSTADKT-AK        | ---TSPFESSVL | ---MELKHGHCVRCTFSFD | ---MILLAT | ---GDGKEIRLMDVSR | ---GELLMLCAP | ---VT | VEEPTHTGGWTLDFSPD | 1198 | S.partitus         | 1255 | RVA     | 1257 |
| T.ubripes          | 1105 | GLFSTADKT-AK        | ---TSPFESSVL | ---MELKHGHCVRCTFSFD | ---MILLAT | ---GDGKEIRLMDVSR | ---GELLMLCAP | ---VT | VEEPTHTGGWTLDFSPD | 1198 | T.ubripes          | 1255 | RVA     | 1257 |
| N.kuhntae          | 1106 | GFSTADKT-AK         | ---TSPFESSVL | ---MELKHGHCVRCTFSFD | ---MILLAT | ---GDGKEIRLMDVSR | ---GELLMLCAP | ---VT | VEEPTHTGGWTLDFSPD | 1198 | N.kuhntae          | 1255 | RVA     | 1257 |
| A.striatus         | 1105 | GLFSTADKT-AK        | ---TSPFESSVL | ---MELKHGHCVRCTFSFD | ---MILLAT | ---GDGKEIRLMDVSR | ---GELLMLCAP | ---VT | VEEPTHTGGWTLDFSPD | 1197 | A.striatus         | 1254 | RVA     | 1256 |
| K.namoratus        | 1105 | GLFSTADKT-AK        | ---TSPFESSVL | ---MELKHGHCVRCTFSFD | ---MILLAT | ---GDGKEIRLMDVSR | ---GELLMLCAP | ---VT | VEEPTHTGGWTLDFSPD | 1197 | K.namoratus        | 1254 | RVA     | 1256 |
| L.oculata          | 1181 | GFSTADKT-AK         | ---TSPFESSVL | ---MELKHGHCVRCTFSFD | ---MILLAT | ---GDGKEIRLMDVSR | ---GELLMLCAP | ---VT | VEEPTHTGGWTLDFSPD | 1193 | L.oculata          | 1258 | IME     | 1262 |
| C.orientalis       | 1106 | GFSTADKT-AK         | ---TSPFESSVL | ---MELKHGHCVRCTFSFD | ---MILLAT | ---GDGKEIRLMDVSR | ---GELLMLCAP | ---VT | VEEPTHTGGWTLDFSPD | 1198 | C.orientalis       | 1246 | IME     | 1248 |
| X.laevis           | 1096 | SKFSTADKT-AK        | ---TSPFESSVL | ---MELKHGHCVRCTFSFD | ---MILLAT | ---GDGKEIRLMDVSR | ---GELLMLCAP | ---VT | VEEPTHTGGWTLDFSPD | 1188 | X.laevis           | 1246 | LIE     | 1248 |
| A.milolepora       | 1197 | DKRLASADKT-AK       | ---TSPFESSVL | ---MELKHGHCVRCTFSFD | ---MILLAT | ---GDGKEIRLMDVSR | ---GELLMLCAP | ---VT | VEEPTHTGGWTLDFSPD | 1200 | A.milolepora       | 1337 | KIS(1)  | 1340 |
| O.faveolata        | 1084 | DKRLASADKT-AK       | ---TSPFESSVL | ---MELKHGHCVRCTFSFD | ---MILLAT | ---GDGKEIRLMDVSR | ---GELLMLCAP | ---VT | VEEPTHTGGWTLDFSPD | 1188 | O.faveolata        | 1644 | RIN(3)  | 1648 |
| N.vectensis        | 1076 | SKRLASADKT-AK       | ---TSPFESSVL | ---MELKHGHCVRCTFSFD | ---MILLAT | ---GDGKEIRLMDVSR | ---GELLMLCAP | ---VT | VEEPTHTGGWTLDFSPD | 1157 | N.vectensis        | 1215 | QI      | 1216 |
| S.kowalevskii      | 1189 | ESLLSTADKT-AK       | ---TSPFESSVL | ---MELKHGHCVRCTFSFD | ---MILLAT | ---GDGKEIRLMDVSR | ---GELLMLCAP | ---VT | VEEPTHTGGWTLDFSPD | 1172 | S.kowalevskii      | 1229 | KVE(9)  | 1239 |
| A.pectinifera      | 1084 | EFKFSSTADKT-AK      | ---TSPFESSVL | ---MELKHGHCVRCTFSFD | ---MILLAT | ---GDGKEIRLMDVSR | ---GELLMLCAP | ---VT | VEEPTHTGGWTLDFSPD | 1167 | A.pectinifera      | 1224 | LIX(9)  | 1265 |
| S.purpuratus       | 1106 | SKFSTADKT-AK        | ---TSPFESSVL | ---MELKHGHCVRCTFSFD | ---MILLAT | ---GDGKEIRLMDVSR | ---GELLMLCAP | ---VT | VEEPTHTGGWTLDFSPD | 1198 | S.purpuratus       | 1242 | RVA(15) | 1294 |
| E.mexicana         | 1234 | RSLVLAENGD-VV       | ---TSPFESSVL | ---MELKHGHCVRCTFSFD | ---MILLAT | ---GDGKEIRLMDVSR | ---GELLMLCAP | ---VT | VEEPTHTGGWTLDFSPD | 1226 | E.mexicana         | 1367 | LOG(2)  | 1368 |
| B.terrestris       | 1131 | KSLVLAENGD-VV       | ---TSPFESSVL | ---MELKHGHCVRCTFSFD | ---MILLAT | ---GDGKEIRLMDVSR | ---GELLMLCAP | ---VT | VEEPTHTGGWTLDFSPD | 1223 | B.terrestris       | 1324 | LOG(2)  | 1327 |
| H.quadrifasciata   | 1128 | KCLVLAENGD-VV       | ---TSPFESSVL | ---MELKHGHCVRCTFSFD | ---MILLAT | ---GDGKEIRLMDVSR | ---GELLMLCAP | ---VT | VEEPTHTGGWTLDFSPD | 1220 | H.quadrifasciata   | 1322 | LYG(2)  | 1324 |
| H.laboriosa        | 1103 | KRLVLAENGD-VV       | ---TSPFESSVL | ---MELKHGHCVRCTFSFD | ---MILLAT | ---GDGKEIRLMDVSR | ---GELLMLCAP | ---VT | VEEPTHTGGWTLDFSPD | 1218 | H.laboriosa        | 1241 | CE(2)   | 1245 |
| D.novaeangliae     | 1132 | KMLVLAENGD-VV       | ---TSPFESSVL | ---MELKHGHCVRCTFSFD | ---MILLAT | ---GDGKEIRLMDVSR | ---GELLMLCAP | ---VT | VEEPTHTGGWTLDFSPD | 1224 | D.novaeangliae     | 1364 | VG(2)   | 1368 |
| A.columbica        | 1125 | KYLALLENGD-VV       | ---TSPFESSVL | ---MELKHGHCVRCTFSFD | ---MILLAT | ---GDGKEIRLMDVSR | ---GELLMLCAP | ---VT | VEEPTHTGGWTLDFSPD | 1220 | A.columbica        | 1358 | LE(7)   | 1359 |
| S.imvicta          | 1104 | EDMLALLENGD-VV      | ---TSPFESSVL | ---MELKHGHCVRCTFSFD | ---MILLAT | ---GDGKEIRLMDVSR | ---GELLMLCAP | ---VT | VEEPTHTGGWTLDFSPD | 1194 | S.imvicta          | 1377 | LIG(9)  | 1388 |
| F.arsianus         | 1118 | EDMLALLENGD-VV      | ---TSPFESSVL | ---MELKHGHCVRCTFSFD | ---MILLAT | ---GDGKEIRLMDVSR | ---GELLMLCAP | ---VT | VEEPTHTGGWTLDFSPD | 1200 | F.arsianus         | 1415 | LFG(2)  | 1419 |
| A.pisum            | 1211 | PSNLVLAENGD-VV      | ---TSPFESSVL | ---MELKHGHCVRCTFSFD | ---MILLAT | ---GDGKEIRLMDVSR | ---GELLMLCAP | ---VT | VEEPTHTGGWTLDFSPD | 1209 | A.pisum            | 1355 | LPS(2)  | 1359 |
| B.mori             | 1235 | NMLVLAENGD-VV       | ---TSPFESSVL | ---MELKHGHCVRCTFSFD | ---MILLAT | ---GDGKEIRLMDVSR | ---GELLMLCAP | ---VT | VEEPTHTGGWTLDFSPD | 1232 | B.mori             | 1427 | WR(1)   | 1430 |
| P.xylostella       | 1281 | KMLVLAENGD-VV       | ---TSPFESSVL | ---MELKHGHCVRCTFSFD | ---MILLAT | ---GDGKEIRLMDVSR | ---GELLMLCAP | ---VT | VEEPTHTGGWTLDFSPD | 1369 | P.xylostella       | 1538 | WR(15)  | 1537 |
| P.machon           | 1274 | KMLVLAENGD-VV       | ---TSPFESSVL | ---MELKHGHCVRCTFSFD | ---MILLAT | ---GDGKEIRLMDVSR | ---GELLMLCAP | ---VT | VEEPTHTGGWTLDFSPD | 1362 | P.machon           | 1523 | WR(3)   | 1528 |
| P.vuthus           | 1408 | KYLALLENGD-VV       | ---TSPFESSVL | ---MELKHGHCVRCTFSFD | ---MILLAT | ---GDGKEIRLMDVSR | ---GELLMLCAP | ---VT | VEEPTHTGGWTLDFSPD | 1401 | P.vuthus           | 1448 | ---     | 1448 |
| C.elegans          | 543  | ---                 | ---          | ---                 | ---       | ---              | ---          | ---   | ---               | 544  | C.elegans          | 543  | ---     | 549  |
| C.simensis         | 1815 | GRVLAENGD-VV        | ---TSPFESSVL | ---MELKHGHCVRCTFSFD | ---MILLAT | ---GDGKEIRLMDVSR | ---GELLMLCAP | ---VT | VEEPTHTGGWTLDFSPD | 1810 | C.simensis         | 2384 | PIG(9)  | 2385 |
| E.multilocularis   | 1176 | GMLAATADKT-AK       | ---TSPFESSVL | ---MELKHGHCVRCTFSFD | ---MILLAT | ---GDGKEIRLMDVSR | ---GELLMLCAP | ---VT | VEEPTHTGGWTLDFSPD | 1170 | E.multilocularis   | 1963 | PIE(47) | 2012 |
| O.melanogaster     | 1158 | NLLVLAENGD-VV       | ---TSPFESSVL | ---MELKHGHCVRCTFSFD | ---MILLAT | ---GDGKEIRLMDVSR | ---GELLMLCAP | ---VT | VEEPTHTGGWTLDFSPD | 1150 | O.melanogaster     | 1369 | LIE(57) | 1429 |
| B.latifrons        | 1154 | NQLVLAENGD-VV       | ---TSPFESSVL | ---MELKHGHCVRCTFSFD | ---MILLAT | ---GDGKEIRLMDVSR | ---GELLMLCAP | ---VT | VEEPTHTGGWTLDFSPD | 1146 | B.latifrons        | 1418 | LMD(25) | 1445 |
| B.cucurbitae       | 1211 | NMLVLAENGD-VV       | ---TSPFESSVL | ---MELKHGHCVRCTFSFD | ---MILLAT | ---GDGKEIRLMDVSR | ---GELLMLCAP | ---VT | VEEPTHTGGWTLDFSPD | 1203 | B.cucurbitae       | 1467 | LMD(25) | 1494 |
| C.capitata         | 1244 | NMLVLAENGD-VV       | ---TSPFESSVL | ---MELKHGHCVRCTFSFD | ---MILLAT | ---GDGKEIRLMDVSR | ---GELLMLCAP | ---VT | VEEPTHTGGWTLDFSPD | 1237 | C.capitata         | 1508 | LMD(28) | 1522 |
| H.sapiens          | 1189 | GKH                 | ---          | ---                 | ---       | ---              | ---          | ---   | ---               | 1245 | H.sapiens          | 1245 | ---     | 1245 |
| G.gallus           | 1191 | SMH                 | ---          | ---                 | ---       | ---              | ---          | ---   | ---               | 1247 | G.gallus           | 1247 | ---     | 1247 |
| C.mydas            | 1223 | SMH                 | ---          | ---                 | ---       | ---              | ---          | ---   | ---               | 1249 | C.mydas            | 1249 | ---     | 1249 |
| C.picta bellii     | 1193 | SMH                 | ---          | ---                 | ---       | ---              | ---          | ---   | ---               | 1249 | C.picta bellii     | 1249 | ---     | 1249 |
| G.japonicas        | 1197 | SMH                 | ---          | ---                 | ---       | ---              | ---          | ---   | ---               | 1253 | G.japonicas        | 1253 | ---     | 1253 |
| P.vitticeps        | 1185 | NEL                 | ---          | ---                 | ---       | ---              | ---          | ---   | ---               | 1243 | P.vitticeps        | 1243 | ---     | 1243 |
| A.carolinensis     | 1186 | NEL                 | ---          | ---                 | ---       | ---              | ---          | ---   | ---               | 1243 | A.carolinensis     | 1243 | ---     | 1243 |
| P.hisvittatus      | 1189 | SMH                 | ---          | ---                 | ---       | ---              | ---          | ---   | ---               | 1245 | P.hisvittatus      | 1245 | ---     | 1245 |
| O.hannah           | 1099 | GKY                 | ---          | ---                 | ---       | ---              | ---          | ---   | ---               | 1155 | O.hannah           | 1155 | ---     | 1155 |
| P.mucrosquamatus   | 1089 | GKY                 | ---          | ---                 | ---       | ---              | ---          | ---   | ---               | 1155 | P.mucrosquamatus   | 1155 | ---     | 1155 |
| A.mississippiensis | 1088 | SMH                 | ---          | ---                 | ---       | ---              | ---          | ---   | ---               | 1225 | A.mississippiensis | 1225 | ---     | 1225 |
| C.porosus          | 1088 | SMH                 | ---          | ---                 | ---       | ---              | ---          | ---   | ---               | 1245 | C.porosus          | 1245 | ---     | 1245 |
| G.gangeticus       | 1089 | SMH                 | ---          | ---                 | ---       | ---              | ---          | ---   | ---               | 1244 | G.gangeticus       | 1244 | ---     | 1244 |
| B.terrieri         | 1105 | NRY                 | ---          | ---                 | ---       | ---              | ---          | ---   | ---               | 1258 | B.terrieri         | 1258 | ---     | 1258 |
| S.rhinocerosus     | 1106 | NRY                 | ---          | ---                 | ---       | ---              | ---          | ---   | ---               | 1258 | S.rhinocerosus     | 1258 | ---     | 1258 |
| S.graham           | 1198 | NRE                 | ---          | ---                 | ---       | ---              | ---          | ---   | ---               | 1258 | S.graham           | 1258 | ---     | 1258 |
| P.nattereri        | 1199 | NRY                 | ---          | ---                 | ---       | ---              | ---          | ---   | ---               | 1258 | P.nattereri        | 1258 | ---     | 1258 |
| A.americanus       | 1203 | NRY                 | ---          | ---                 | ---       | ---              | ---          | ---   | ---               | 1258 | A.americanus       | 1258 | ---     | 1258 |
| I.punctatus        | 1199 | NRY                 | ---          | ---                 | ---       | ---              | ---          | ---   | ---               | 1258 | I.punctatus        | 1258 | ---     | 1258 |
| E.lucius           | 1122 | NRY                 | ---          | ---                 | ---       | ---              | ---          | ---   | ---               | 1258 | E.lucius           | 1258 | ---     | 1258 |
| S.salar            | 1107 | NRY                 | ---          | ---                 | ---       | ---              | ---          | ---   | ---               | 1258 | S.salar            | 1258 | ---     | 1258 |
| P.latiplana        | 1201 | NRY                 | ---          | ---                 | ---       | ---              | ---          | ---   | ---               | 1258 | P.latiplana        | 1258 | ---     | 1258 |
| X.naculatus        | 1200 | NSV                 | ---          | ---                 | ---       | ---              | ---          | ---   | ---               | 1256 | X.naculatus        | 1256 | ---     | 1256 |
| C.variegatus       | 1199 | NSV                 | ---          | ---                 | ---       | ---              | ---          | ---   | ---               | 1256 | C.variegatus       | 1256 | ---     | 1256 |
| P.yererei          | 1199 | NSL                 | ---          | ---                 | ---       | ---              | ---          | ---   | ---               | 1254 | P.yererei</        |      |         |      |



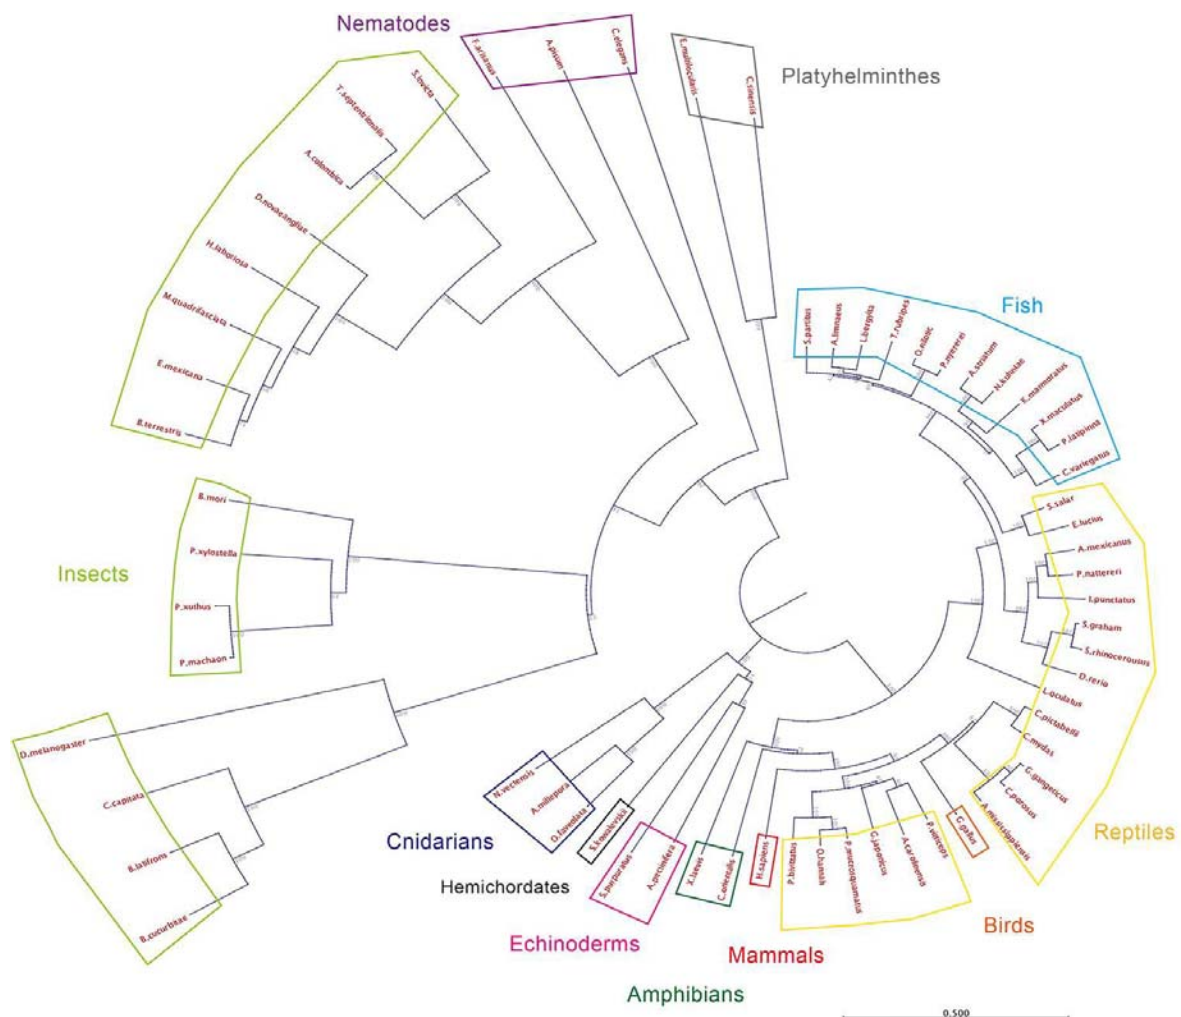

**Supplemental Figure S4.** Phylogenetic tree of Apaf-1 family proteins. The phylogenetic tree was calculated using CLC Sequence Viewer ver.7.6 (CLC Bio A/S, Aarhus, Denmark) based on the alignment in Fig. S1. The species used for the alignment were mammals (red), birds (orange), reptiles (yellow), fishes (light blue), amphibians (green), cnidarians (blue), hemichordates (black), echinoderms (pink), insects (light green), nematode (purple), platyhelminthes (gray). A bootstrap value, a measure of the confidence in the branch, is attached to each node.

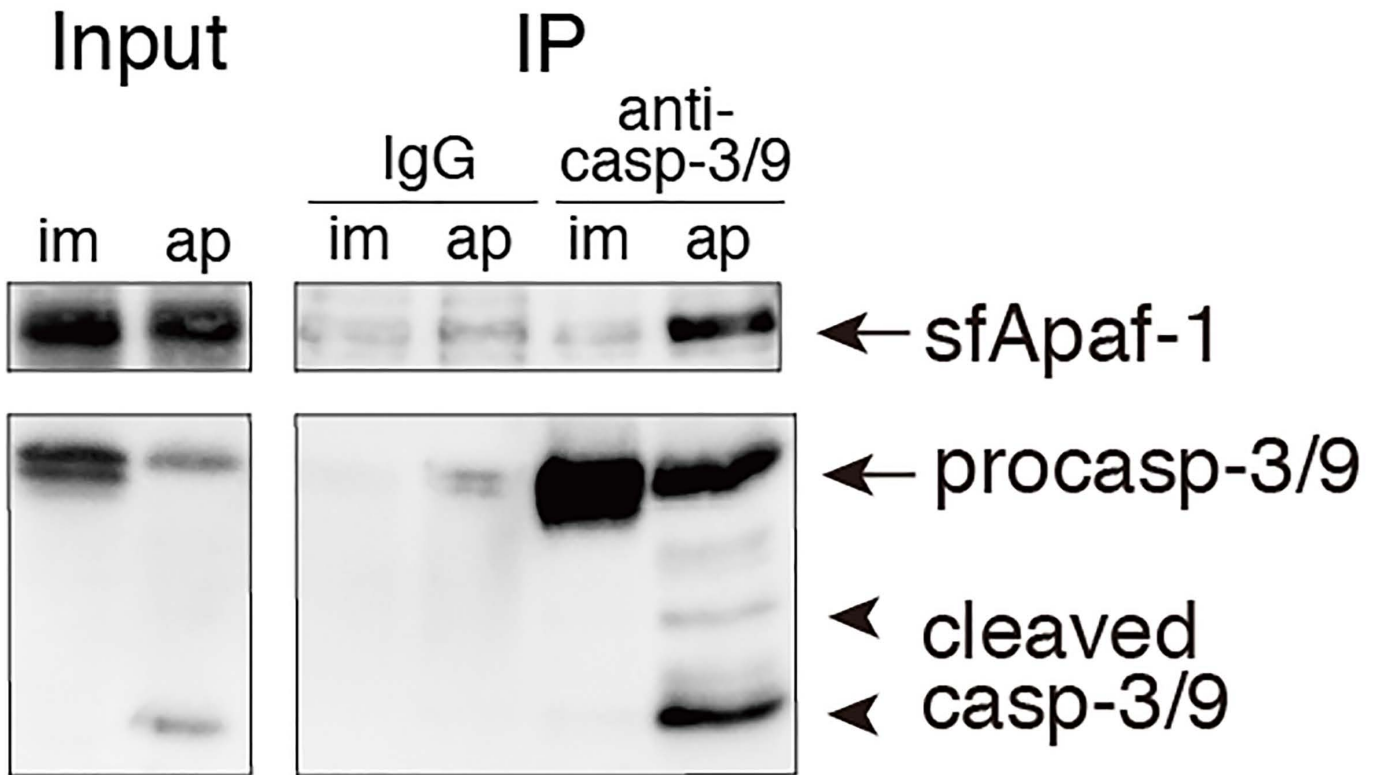

**Supplemental Figure S5.** Co-immunoprecipitation of endogenous sfApaf-1 and caspase-3/9. Cell-free preparations from immature oocytes (im) or apoptotic eggs (ap) were incubated with anti-caspase-3/9 antibody or control IgG-coupled Protein A Sepharose beads. Immunoprecipitates were analyzed by western blotting using anti-sfApaf-1 antibody (upper panel) or anti-caspase-3/9 antibody (lower panel).

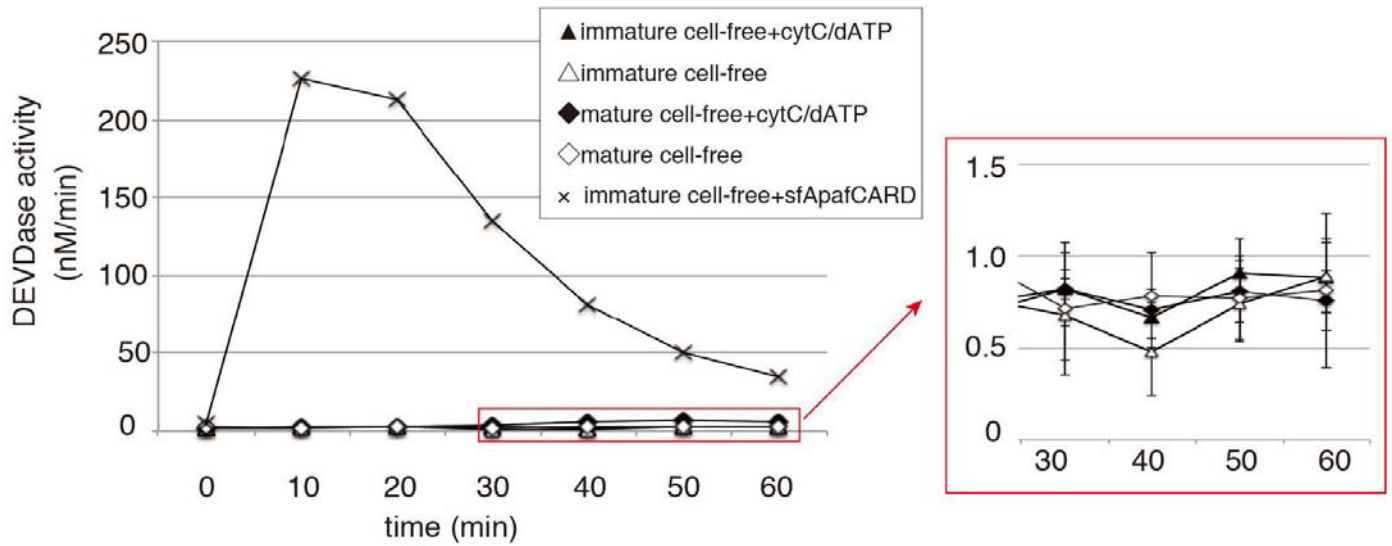

**Supplemental Figure S6.** Cytochrome *c* does not activate caspase-3/9 in starfish cell-free preparations. Cell-free preparations using immature oocytes and mature eggs were made according to the method of Chiba *et al.* (1999). Time course of DEVDase activity was measured in the presence (immature▲, mature◆) or absence (immature△, mature◇) of 10  $\mu$ M cytochrome *c* and 1 mM dATP. Positive control experiments were performed in the presence of 2 mM GST-A-CARD (×).

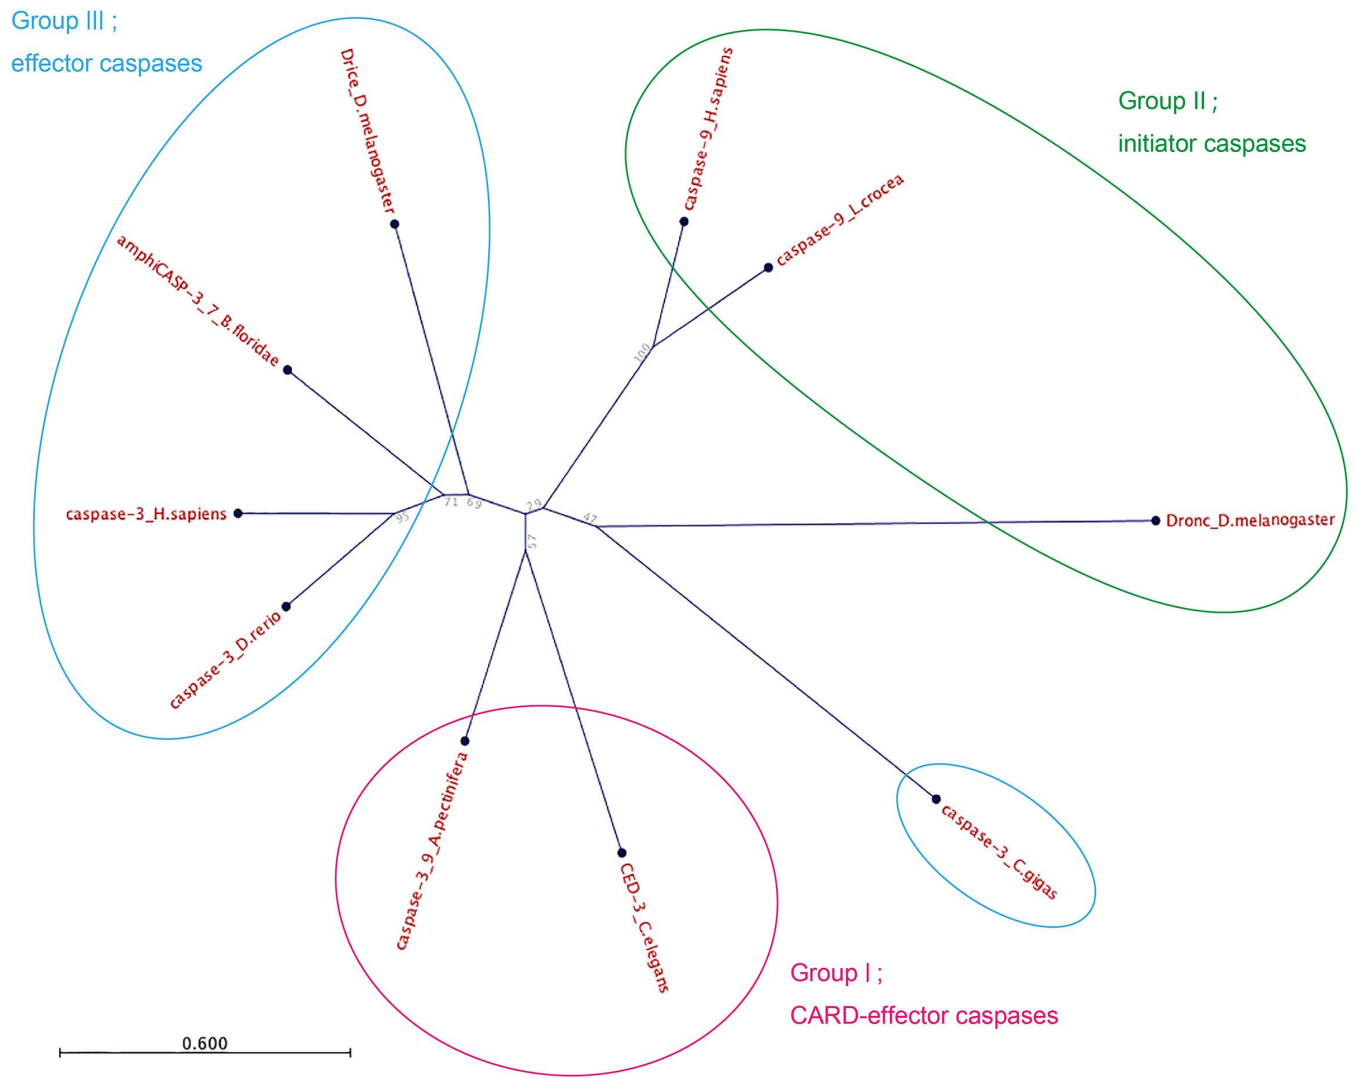

**Supplemental Fig. S7.** Phylogenetic tree of the caspases whose proteolytic activities were examined using recombinants. The phylogenetic tree was calculated using CLC Sequence Viewer ver.7.6 (CLC Bio A/S, Aarhus, Denmark) based on the alignment which the long insertions were deleted. The species used for phylogenetic tree were *H. sapiens* caspase-3 (CAC88866) and caspase-9 (BAA87905), *D. rerio* caspase-3 (BAB32409), *Pseudosciaena crocea* caspase-9 (ACJ65026), *C.gigas* caspase-3 (XP\_011449627), *B. floridae* AmphiCASP-3/7 (AAN45849), *C. elegans* CED-3 (AAG42045), *D. melanogaster* Drice (CAA72937) and Dronc (AAD26625), and *A. pectinifera* caspase-3/9. A bootstrap value, a measure of the confidence in the branch, is attached to each node.

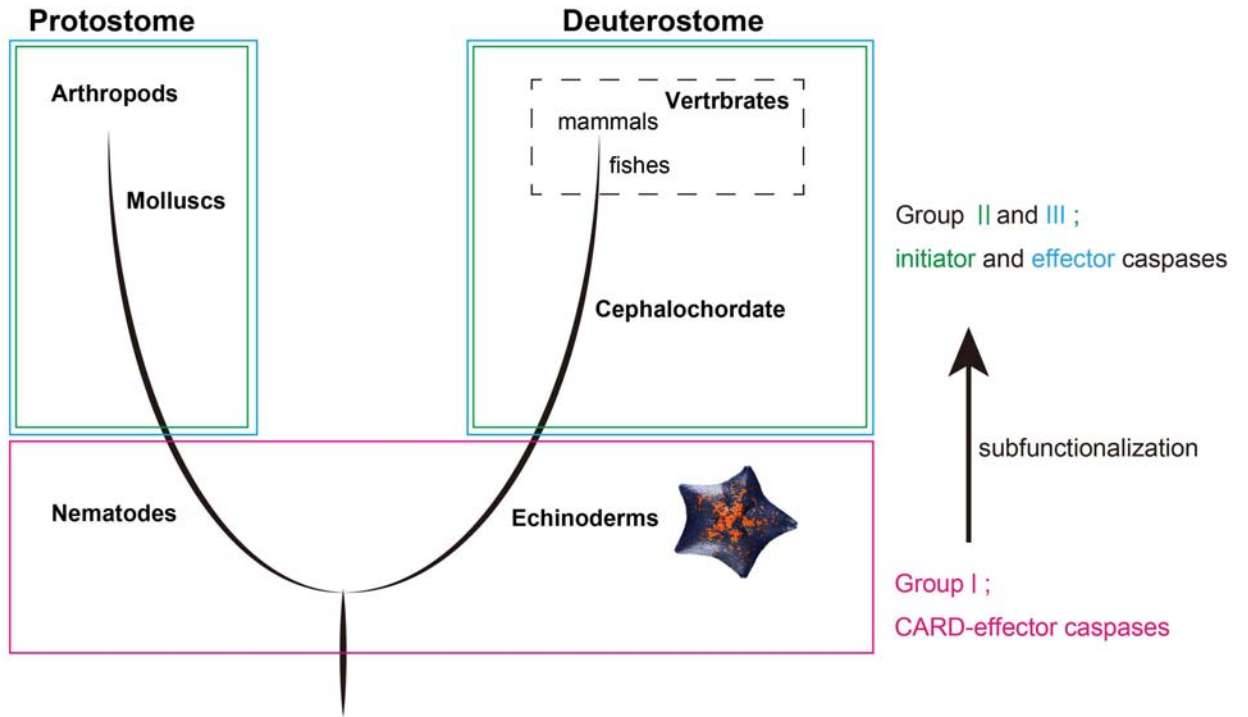

**Supplementa Figure S8.** Evolutionary trends of caspases. Conservation of caspases throughout animal evolution. Group I (CARD-effector caspases), Group II (initiator caspases), and Group III (effector caspases) are boxed in pink, green, and blue, respectively.

```

caspase-3/9   YIASPTDELPKAPWPGTTPADLTTQEMPMAPLPLADQDASDVD 178
caspase-9     VVLRPEIRKPEVLRP-ETPRPVDIGSGGFGDVGALESIRGNAD 150
               : * . *:. * ** : . :. : :. :..*

```

**Supplemental Figure S9.** Conservation of the MAPK consensus motif. MAPK consensus motif is boxed in starfish caspase-3/9 (136–178 aa) and human caspase-9 (109–150 aa). Sequence alignment was generated using MAFFT alignment program. Symbols at the bottom of protein sequences are indicated conserved sequences (\*), conservative mutations (:), semi-conservative mutations (.), and non-conservative mutations ( ), respectively.

For Figure 2a

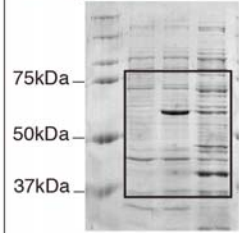

For Figure 3a

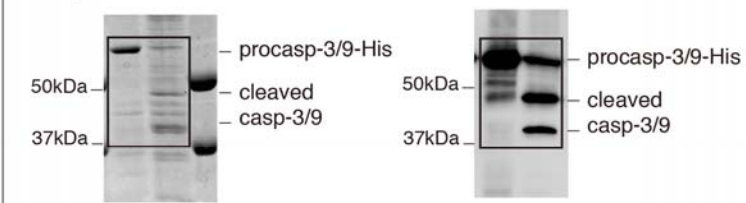

For Figure 3b

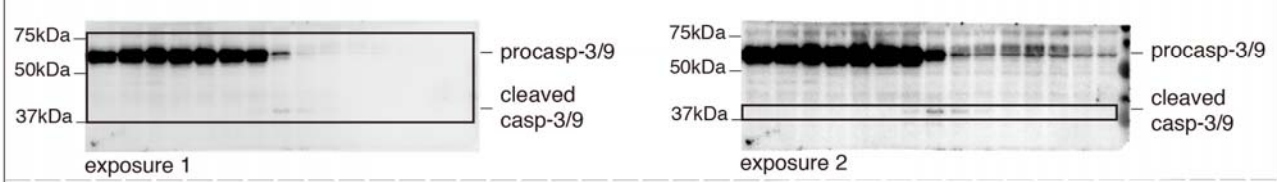

For Figure 3c

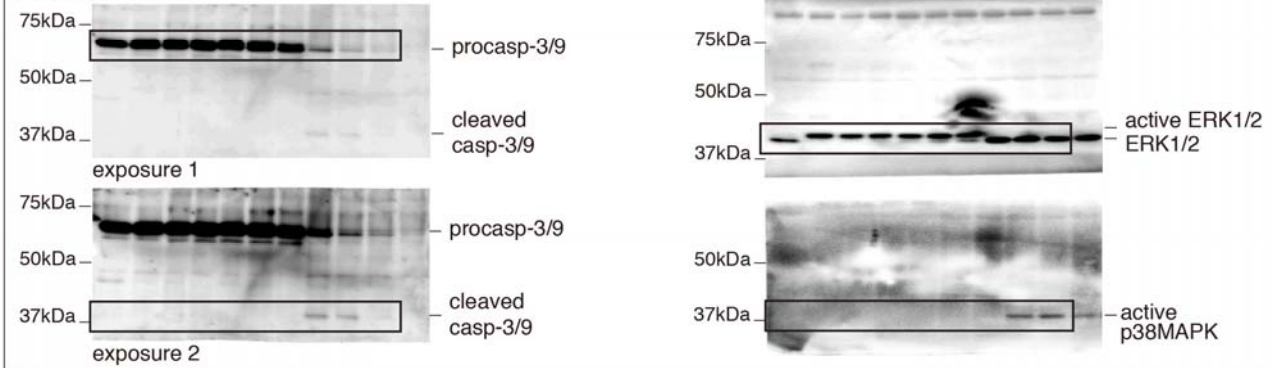

For Figure 5a

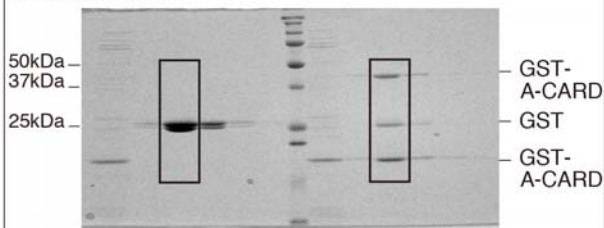

For Figure 5b

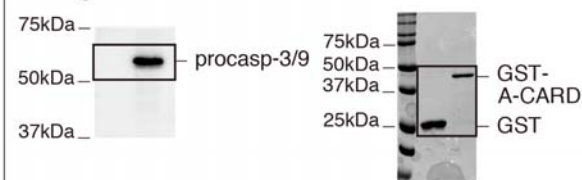

For Figure 6b

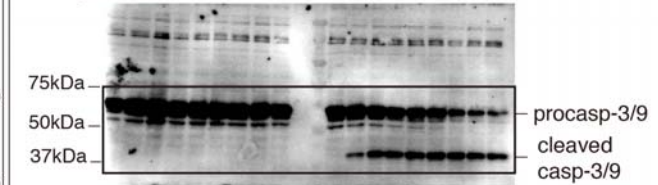

For Figure 6c

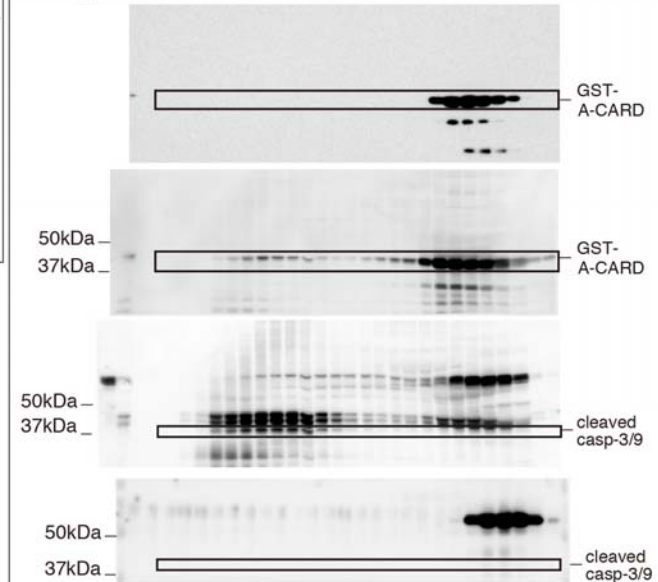

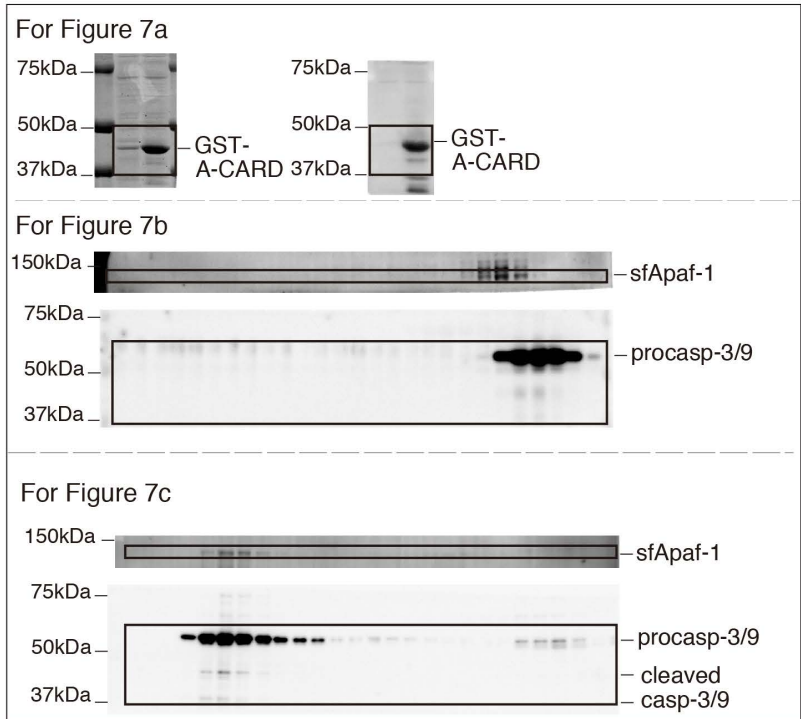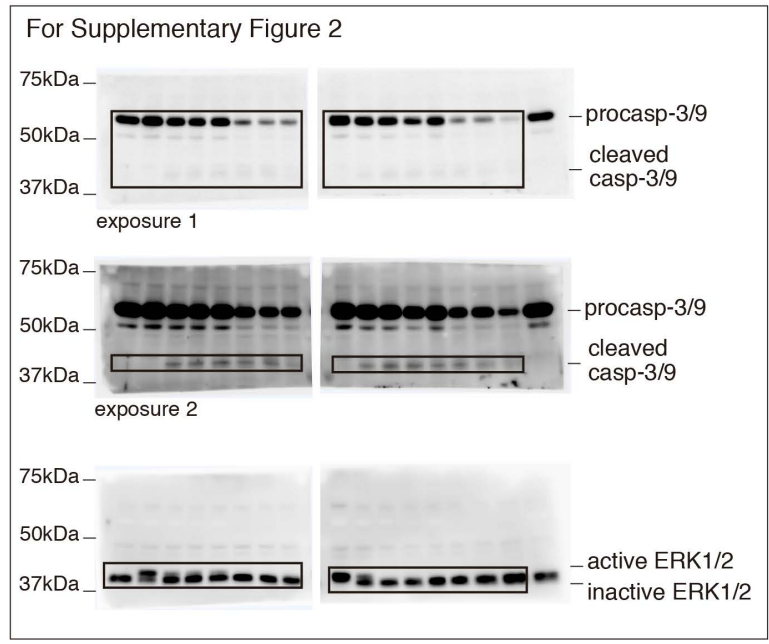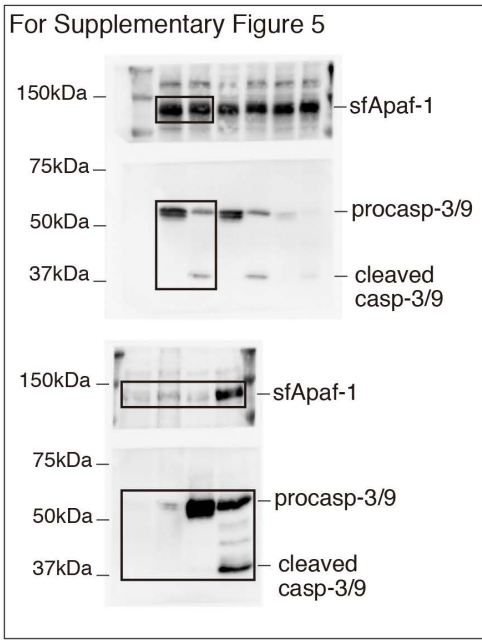

**Supplemental Figure S10.** Full-length gels and blots used for Figure 1-7 and Supplementary Figures.



**Supplemental Table S1. Primers for cDNA cloning.**

| primer                                                   | sequences (5'-3') |                            |
|----------------------------------------------------------|-------------------|----------------------------|
| degenerate primers for caspase-3/9                       | Fw                | ATCATHAAYAAYAARAAYTTYSA    |
|                                                          | Re                | GCCTGRATRAARAANAGTTTRGGYTT |
| specific primers for caspase-3/9                         | Fw                | TGGCAAGAACCTGAAGCACGTG     |
|                                                          | Re                | TCTGCTGCATTTGCTTCCCGGTC    |
| degenerate primers for a partial sfApaf-1                | Fw                | GGNGGNGTNCCNATNCCICC       |
|                                                          | Re                | ARRAARTCNARYGNARRTYRTG     |
| degenerate primers for a partial sfApaf-1 for nested PCR | Fw                | CATGGNATGGGNGGNATNGGIAAR   |
|                                                          | Re                | ARRTARTAYTCCANCKIKTIGG     |
| specific primers for 5' RACE for cDNA transcription      |                   | [Phos]CTCAATCTATCCTT       |
| specific primers for 5' RACE                             |                   | CACAGGTCTGTAGCTTGGT        |
|                                                          |                   | AGACTAGACCGTGAGTCC         |
| specific primers for 5' RACE for nested PCR              |                   | CTGATGGCGACCCAGAACAC       |
|                                                          |                   | CCCACTCAACCTGGAGGAG        |
| specific primers for 3' RACE                             |                   | ATAAGCTGCGCTGCATGA         |
| specific primers for 3' RACE for nested PCR              |                   | CAGGAATGGGATGATGATAAGCT    |
